# Supplementary material for: Swedish experience-based value sets for EQ-5D health states
Source: Springer Nature journal article supplement (doi:10.1007/s11136-013-0496-4), 2013-08-21
Supplement: MOESM1 [file 5718042]

**Online Resource (11136\_2013\_496\_MOESM1\_ESM.pdf)**

**JOURNAL:**

***Quality of Life Research* (2013) DOI 10.1007/s11136-013-0496-4**

**TITLE:**

**SWEDISH EXPERIENCE-BASED VALUE SETS FOR EQ-5D HEALTH STATES**

**AUTHORS:**

Kristina Burström<sup>1, 2, 3</sup>

Sun Sun<sup>1, 3</sup>

Ulf-G Gerdtham<sup>4, 5, 6</sup>

Martin Henriksson<sup>7</sup>

Magnus Johannesson<sup>8</sup>

Lars-Åke Levin<sup>9</sup>

Niklas Zethraeus<sup>1, 10</sup>

<sup>1</sup> Department of Learning, Informatics, Management and Ethics, Medical Management Centre, Karolinska Institutet, Tomtebodavägen 18A, 171 77 Stockholm, Sweden

<sup>2</sup> Department of Public Health Sciences, Equity and Health Policy Research Group, Karolinska Institutet, Tomtebodavägen 18A, 171 77 Stockholm, Sweden

<sup>3</sup> Stockholm County Council, Health Care Services, Tomtebodavägen 18A, 171 77 Stockholm, Sweden

<sup>4</sup> Department of Economics, Lund University, P.O. Box 7082, 220 07 Lund, Sweden

<sup>5</sup> Health Economics and Management, Institute of Economic Research, Lund University, P.O. Box 7082, 220 07 Lund, Sweden

<sup>6</sup> Centre for Primary Health Care Research, Lund University, P.O. Box 7082, 220 07 Lund, Sweden

<sup>7</sup> Department of Health Economics, AstraZeneca Nordic, 151 85 Södertälje, Sweden

<sup>8</sup> Department of Economics, Stockholm School of Economics, P.O. Box 6501, 113 83 Stockholm, Sweden

<sup>9</sup> Department of Medical and Health Sciences, Center for Medical Technology Assessment, Linköping University, 581 83 Linköping, Sweden

<sup>10</sup> The Dental and Pharmaceutical Benefits Agency, P.O. Box 225 20, 104 22 Stockholm, Sweden

**CORRESPONDING AUTHOR:**

Kristina Burström

Associate Professor of Health Economics

Karolinska Institutet

Department of Learning, Informatics, Management and Ethics

Tomtebodavägen 18A, SE-171 77 Stockholm, Sweden

Email: kristina.burstrom@ki.se

## TABLES AND FIGURE IN ONLINE RESOURCE

**Supplementary Table S1** Socio-demographic characteristics of the populations 2004 and 2006, census data and data from the ULF survey

**Supplementary Table S2** Characteristics of the respondents, by survey

**Supplementary Table S3** Estimated TTO and VAS values for EQ-5D health states

**Supplementary Table S4** Regression analysis on VAS values, EQ-5D dimensions

**Supplementary Table S5** Correlation and Mean Absolute Difference (MAD), VAS values, EQ-5D

**Supplementary Table S6** Regression analysis, comparison of TTO and VAS values, EQ-5D dimensions, main effect models, pooled data

**Supplementary Table S7** Regression analysis on TTO and VAS values, EQ-5D dimensions, main effect models, comparison by survey

**Supplementary Table S8** Regression analysis on TTO and VAS values, SRH

**Supplementary Table S9** Estimated TTO and VAS values for SRH

**Supplementary Table S10** Regression analysis, comparison of TTO and VAS values, SRH, main effect model, pooled data

**Supplementary Table S11** Regression analysis on TTO and VAS values, SRH, main effect model, comparison by survey

**Supplementary Fig. S1** Estimated VAS values predicted by different OLS models compared to the observed mean VAS values for health states with five or more observations (n=80)

## DATA

### Response rate, internal non-responders, exclusion criteria

Data consisted of responses from 51,254 individuals, aged 18–80 years. The response rates were similar in the surveys: 59% (in the 2004 survey) and 61% (in the 2006 survey) yielding a sample size of 27,963 individuals aged 18–80 years (2004 survey), and 23,291 individuals aged 18–64 years (2006 survey). Women had a higher response rate than men. After exclusion of 2,085 individuals (4%), who had missing answer on any of the EQ-5D dimensions, 49,169 individuals were included. The proportions of missing answers were 5% (2004 survey) and 3% (2006 survey).

Subsequently, 3,692 individuals (7.5%) were excluded from the TTO analyses due to missing TTO answer. The proportions of missing answers were 9.5% (2004 survey) and 5.1% (2006 survey).

Thus, the pooled data set for the present TTO analyses consisted of 45,477 individuals. Similarly, 7,408 (15.1%) individuals were excluded from the VAS analyses due to missing answer on the VAS. The proportions of missing answers were 24.0% (2004 survey) and 4.5% (2006 survey).

Thus, the pooled data set for the present VAS analyses consisted of 41,761 individuals. Before carrying out analyses on the SRH question individuals with missing answer on SRH were excluded: 741 individuals for the TTO analyses and 637 individuals for the VAS analyses.

The internal non-responders to the TTO question (7.5%) had a significantly higher mean age and worse health status compared to those who had answer the TTO question. Non-response to the TTO question was more common among women than among men and in groups with lower education and among manual workers. The same pattern was seen in non-responders to the VAS question (15.1%) except that there was no difference in non-response rate between men and women. Due to the higher proportion of non-responders to the VAS question in the 2004 survey we examined the two surveys separately with respect to VAS, resulting in the same pattern as in the pooled data.

However, in the 2004 survey the non-response rate was higher among women than men, as found in the analyses of non-responders to the TTO question for the pooled data.

### **Categorisation of age, educational level and socioeconomic group**

Age was categorised in the age groups: 18–24; 25–34; 35–44; 45–54; 55–64; 65–74; 75–88 years (reference group 18–24 years). Educational level was categorized into low (elementary school 9–10 years); medium (secondary school 3–4 years); high (more than 3–4 years secondary school). Low education was used as reference group. Respondents were categorized into six socioeconomic groups: unskilled manual; skilled manual; lower non-manual; intermediate non-manual; higher non-manual; self-employed and farmers (reference group unskilled manual workers).

### **Test for parameter homogeneity across surveys**

The estimated models were tested for homogeneity in the parameters of the regressors across the two surveys of the pooled model, with the age restricted to 18–64 years, i.e. the intercept and the slope of all regressors. In this F-test analysis, we hypothesised that the intercepts were equal in the two surveys. Given rejection of this hypothesis we secondly tested the hypothesis that the parameters of all socio-demographic regressors were equal. Given rejection of this hypothesis we finally tested the hypothesis that the parameters of all the dimensional regressors (mobility; self-care; usual activities; pain/discomfort; anxiety/depression) were equal.

## **SUPPLEMENTARY RESULTS**

### **Regression analysis on VAS values for EQ-5D dimensions**

Results of the regression analysis on individual VAS values for EQ-5D dimensions are presented in Supplementary Table S4.

The VAS results were consistent with lower values the more severe the health state was (Model 1), except for self-care and mobility where the value for level 3 was not lower compared to level 2. For the self-care dimension the coefficient for level 3 was positive, but not significant. The N3 variable had a negative sign and was significant (Model 2). The results when entering the MO23 and SC23 variables (merged levels 2 and 3 for mobility and self-care) are shown in Model 3 and Model 4 (including N3).

For health states with five or more observations the Spearman correlation coefficient was greatest for Model 3 and MAD was smallest for Model 4 (Supplementary Table S5). For health states with ten or more observations the correlation was highest and MAD was smallest in Model 4. The adjusted  $R^2$  was similar for all models (around 0.48) (Supplementary Table S4).

Supplementary Figure S1 shows the estimated VAS values predicted by the different OLS models compared to the observed mean VAS values for health states with five or more observations.

Looking at the main effects (Model 4), severe problems in the anxiety/depression dimension had the greatest coefficient (23.7), followed by usual activities (15.0) and pain/discomfort (12.9) (Supplementary Table S4). For moderate problems, the greatest coefficient was for usual activities (12.1) followed by anxiety/depression (10.0) and pain/discomfort (6.7). The merged coefficients for mobility (9.8) and self-care (0.8) represented any move away from no problems. The difference

between the predicted and the observed mean values exceeded 10 for 14% of the health states with five or more observations.

The effect of age, sex, education and socioeconomic group on VAS values followed the same tendency as the effect on TTO values.

A Swedish VAS value set, based on Model 4, for the 243 health states, is presented in Supplementary Table S3.

Comparison of TTO and VAS values for Models 2 and 4 for EQ-5D is presented in Supplementary Table S6 (pooled data) and Table S7 (by survey).

### **Regression analysis on TTO values and VAS values for SRH**

Results of the regression analysis on individual TTO and VAS values for SRH levels are presented in Supplementary Table S8. Both TTO and VAS were consistent and significant with lower values the poorer the level of SRH. The effect of socio-demographic variables was similar to the results for EQ-5D dimensions, except the coefficient for sex on the VAS values that was negative.

The TTO and VAS values, estimated based on Model 1, for the different severity levels for SRH, are presented in Supplementary Table S9. These results can be used to convert SRH to TTO and VAS values in studies that include information on SRH.

Comparison of TTO and VAS values for SRH levels is presented in Supplementary Table S10 (pooled data) and Table S11 (by survey).

## Split sample test

The results for the Spearman correlation coefficients and the MAD in the split sample test were similar to those obtained in the whole sample. For the TTO model, for health states with five or more observations, the Spearman correlation coefficient remained 0.83 and the MAD was still below 0.06. For the VAS model, for health states with five or more observations, the Spearman correlation coefficient was 0.93, and the MAD was 5.0, similar to that of the whole sample. For health states with ten or more observations, the results from the split sample test showed greater Spearman correlation coefficients and smaller MAD, compared to health states with five or more observations, which was similar to the findings from the whole sample.

## Homogeneity across surveys

The results of the F-tests showed that homogeneity of the regression coefficients across surveys were rejected irrespectively of whether TTO or VAS were considered or inclusion of socio-demographic control factors; indicating that the effects of the regressors, both socio-demographic and dimensional regressors, on TTO and VAS values were not equal across the two surveys (except for dimensional regressors on TTO values in the SRH regression) (Table 3 main manuscript; Supplementary Tables S4 and S8). It is likely that this heterogeneity is mainly due to regional heterogeneity since there is only a two-year time difference between the surveys in the different areas. In the TTO regression, the N3 variable was smaller and non-significant in the 2006 survey and the greatest difference was seen in the anxiety/depression dimension (Supplementary Table S7). In the VAS regression, the differences were similar.

**Supplementary Table S1** Socio-demographic characteristics of the populations 2004 and 2006, census data and data from ULF survey

|                                                               | 2004              |                   | 2006             |                   |
|---------------------------------------------------------------|-------------------|-------------------|------------------|-------------------|
|                                                               | Scania Region     | Sweden            | Stockholm County | Sweden            |
| <b>Proportion of whole population (%)<sup>a</sup></b>         | 12.9              | n.a.              | 21.0             | n.a.              |
| <b>Living outside localities (%)<sup>a</sup></b>              | <sup>e</sup> 12.3 | <sup>e</sup> 15.6 | <sup>e</sup> 4.6 | <sup>e</sup> 15.6 |
| <b>Women (%)<sup>a</sup></b>                                  | 50.8              | 50.4              | 50.8             | 50.4              |
| <b>Mean age (years)<sup>a</sup></b>                           | 40.9              | 40.8              | 39.1             | 40.9              |
| <b>Married (%) 20-64 years<sup>a</sup></b>                    | 45.6              | 43.5              | 40.7             | 43.0              |
| <b>Educational level (%) 20-64 years<sup>a</sup></b>          |                   |                   |                  |                   |
| Elementary school (9-10 years)                                | 17.8              | 17.1              | 13.8             | 15.9              |
| Secondary school 3-4 years                                    | 46.7              | 48.6              | 41.8             | 48.2              |
| More than 3-4 years secondary school                          | 33.7              | 32.9              | 42.0             | 34.1              |
| <b>Mean income (SEK<sup>b</sup>) 20-64 years<sup>a</sup></b>  | 212,500           | 227,900           | 275,400          | 242,000           |
| <b>Socioeconomic group (%) 20-64 years<sup>c</sup></b>        |                   |                   |                  |                   |
| Unskilled manual workers                                      | 16.3              | 17.7              | 11.0             | 17.4              |
| Skilled manual workers                                        | 14.1              | 12.7              | 8.8              | 14.4              |
| Lower non-manual workers                                      | 10.5              | 10.9              | 11.8             | 11.4              |
| Intermediate non-manual workers                               | 17.3              | 18.6              | 21.7             | 18.7              |
| Higher non-manual workers                                     | 13.7              | 13.1              | 22.2             | 13.0              |
| Self-employed and farmers                                     | 7.0               | 7.7               | 8.8              | 7.5               |
| <b>Less than good SRH (%) 20-64 years<sup>c,d</sup></b>       | 19.5              | 23.1              | 19.3             | 21.7              |
| <b>Proportion of whole population 20-64 years<sup>c</sup></b> | 12.3              | n.a.              | 20.6             | n.a.              |
| <b>Women (%) 20-64 years<sup>c</sup></b>                      | 50.1              | 49.7              | 52.4             | 50.5              |
| <b>Mean age (years) 20-64 years<sup>c</sup></b>               | 42.0              | 42.7              | 42.6             | 43.3              |

<sup>a</sup> Census data

<sup>b</sup> Current prices (Swedish Kronor) SEK 1 = Euro 0.109 (2004, 2006)

<sup>c</sup> Data from Statistics Sweden's Survey of Living Conditions (ULF)

<sup>d</sup> SRH self-rated health

<sup>e</sup> Data from 2005



**Supplementary Table S2** Characteristics of the respondents, by survey

| Variable                                        | 2004 survey               |        | 2006 survey               |        |
|-------------------------------------------------|---------------------------|--------|---------------------------|--------|
|                                                 | 18-80 years<br>(n=26,627) |        | 18-64 years<br>(n=22,542) |        |
|                                                 | %                         | n      | %                         | n      |
| <b>Women</b>                                    | 54.7                      | 14,553 | 58.3                      | 13,147 |
| <b>Mean age</b>                                 | 48.5 years                | 26,627 | 43.4 years                | 22,542 |
| <b>Age group</b>                                |                           |        |                           |        |
| 18-24 years                                     | 9.2                       | 2,443  | 9.0                       | 2,040  |
| 25-34 years                                     | 15.1                      | 4,017  | 18.7                      | 4,222  |
| 35-44 years                                     | 17.9                      | 4,779  | 24.5                      | 5,516  |
| 45-54 years                                     | 18.1                      | 4,811  | 22.2                      | 4,993  |
| 55-64 years                                     | 20.0                      | 5,337  | 25.6                      | 5,771  |
| 65-74 years                                     | 13.9                      | 3,692  | n.a.                      | n.a.   |
| 75-80 years                                     | 5.8                       | 1,548  | n.a.                      | n.a.   |
| <b>Educational level</b>                        |                           |        |                           |        |
| Low                                             | 20.3                      | 5,420  | 13.3                      | 2,994  |
| Medium                                          | 42.1                      | 11,200 | 42.2                      | 9,503  |
| High                                            | 31.9                      | 8,489  | 42.9                      | 9,683  |
| Missing                                         | 5.7                       | 1,518  | 1.6                       | 362    |
| <b>Socioeconomic group</b>                      |                           |        |                           |        |
| Unskilled manual                                | 19.6                      | 5,227  | 15.8                      | 3,561  |
| Skilled manual                                  | 12.2                      | 3,238  | 12.0                      | 2,711  |
| Lower non-manual                                | 8.7                       | 2,312  | 13.5                      | 3,050  |
| Intermediate non-manual                         | 15.0                      | 3,989  | 23.1                      | 5,197  |
| Higher non-manual                               | 9.6                       | 2,569  | 18.6                      | 4,182  |
| Self-employed and farmers                       | 1.7                       | 450    | 6.8                       | 1,539  |
| Other                                           | 33.2                      | 8,842  | 10.21                     | 2,302  |
| <b>Less than good SRH</b>                       | 30.0                      | 7,994  | 24.8                      | 5,599  |
| <b>Mobility</b>                                 |                           |        |                           |        |
| Moderate problems (level 2)                     | 11.0                      | 2,924  | 8.5                       | 1,916  |
| Severe problems (level 3)                       | 0.1                       | 24     | 0.1                       | 26     |
| <b>Self-care</b>                                |                           |        |                           |        |
| Moderate problems (level 2)                     | 1.1                       | 294    | 1.4                       | 306    |
| Severe problems (level 3)                       | 0.5                       | 129    | 0.3                       | 69     |
| <b>Usual activities</b>                         |                           |        |                           |        |
| Moderate problems (level 2)                     | 6.7                       | 1,785  | 8.9                       | 2,000  |
| Severe problems (level 3)                       | 1.0                       | 276    | 1.2                       | 260    |
| <b>Pain/discomfort</b>                          |                           |        |                           |        |
| Moderate problems (level 2)                     | 50.1                      | 13,351 | 39.2                      | 8,834  |
| Severe problems (level 3)                       | 4.7                       | 1,259  | 3.5                       | 779    |
| <b>Anxiety/depression</b>                       |                           |        |                           |        |
| Moderate problems (level 2)                     | 30.4                      | 8,080  | 31.3                      | 7,046  |
| Severe problems (level 3)                       | 2.5                       | 677    | 2.9                       | 645    |
| <b>Problems in at least one EQ-5D dimension</b> | 63.8                      | 16,998 | 56.0                      | 12,620 |
| <b>Problems on level 3</b>                      | 7.2                       | 1,916  | 6.1                       | 1,371  |
| <b>TTO (mean)</b>                               | 0.90                      | 24,090 | 0.92                      | 21,387 |
| <b>EQ VAS (mean)</b>                            | 79.1                      | 20,229 | 79.9                      | 21,532 |

TTO time trade off, VAS visual analogue scale, SRH self-rated health

**Supplementary Table S3** Estimated TTO and VAS values for EQ-5D health states

| Obs | EQ-5D | TTO value | VAS value | Obs | EQ-5D | TTO value | VAS value | Obs | EQ-5D | TTO value | VAS value |
|-----|-------|-----------|-----------|-----|-------|-----------|-----------|-----|-------|-----------|-----------|
| 1   | 11111 | 0.9694    | 88.86     | 82  | 21111 | 0.9028    | 79.10     | 163 | 31111 | 0.8015    | 69.65     |
| 2   | 11112 | 0.9142    | 78.90     | 83  | 21112 | 0.8477    | 69.13     | 164 | 31112 | 0.7463    | 59.69     |
| 3   | 11113 | 0.7185    | 55.69     | 84  | 21113 | 0.6519    | 45.93     | 165 | 31113 | 0.5938    | 45.93     |
| 4   | 11121 | 0.9349    | 82.16     | 85  | 21121 | 0.8683    | 72.39     | 166 | 31121 | 0.7669    | 62.94     |
| 5   | 11122 | 0.8797    | 72.19     | 86  | 21122 | 0.8131    | 62.43     | 167 | 31122 | 0.7117    | 52.98     |
| 6   | 11123 | 0.6839    | 48.99     | 87  | 21123 | 0.6174    | 39.22     | 168 | 31123 | 0.5593    | 39.22     |
| 7   | 11131 | 0.8357    | 66.51     | 88  | 21131 | 0.7691    | 56.75     | 169 | 31131 | 0.7110    | 56.75     |
| 8   | 11132 | 0.7805    | 56.55     | 89  | 21132 | 0.7139    | 46.78     | 170 | 31132 | 0.6558    | 46.78     |
| 9   | 11133 | 0.6280    | 42.79     | 90  | 21133 | 0.5615    | 33.02     | 171 | 31133 | 0.5034    | 33.02     |
| 10  | 11211 | 0.8682    | 76.75     | 91  | 21211 | 0.8016    | 66.99     | 172 | 31211 | 0.7002    | 57.54     |
| 11  | 11212 | 0.8130    | 66.79     | 92  | 21212 | 0.7464    | 57.02     | 173 | 31212 | 0.6450    | 47.58     |
| 12  | 11213 | 0.6172    | 43.58     | 93  | 21213 | 0.5507    | 33.82     | 174 | 31213 | 0.4926    | 33.82     |
| 13  | 11221 | 0.8336    | 70.04     | 94  | 21221 | 0.7671    | 60.28     | 175 | 31221 | 0.6657    | 50.83     |
| 14  | 11222 | 0.7784    | 60.08     | 95  | 21222 | 0.7119    | 50.32     | 176 | 31222 | 0.6105    | 40.87     |
| 15  | 11223 | 0.5827    | 36.88     | 96  | 21223 | 0.5161    | 27.11     | 177 | 31223 | 0.4580    | 27.11     |
| 16  | 11231 | 0.7345    | 54.40     | 97  | 21231 | 0.6679    | 44.64     | 178 | 31231 | 0.6098    | 44.64     |
| 17  | 11232 | 0.6793    | 44.44     | 98  | 21232 | 0.6127    | 34.67     | 179 | 31232 | 0.5546    | 34.67     |
| 18  | 11233 | 0.5268    | 30.68     | 99  | 21233 | 0.4602    | 20.91     | 180 | 31233 | 0.4021    | 20.91     |
| 19  | 11311 | 0.7906    | 64.42     | 100 | 21311 | 0.7241    | 54.65     | 181 | 31311 | 0.6660    | 54.65     |
| 20  | 11312 | 0.7354    | 54.45     | 101 | 21312 | 0.6689    | 44.69     | 182 | 31312 | 0.6108    | 44.69     |
| 21  | 11313 | 0.5830    | 40.69     | 102 | 21313 | 0.5164    | 30.93     | 183 | 31313 | 0.4583    | 30.93     |
| 22  | 11321 | 0.7561    | 57.71     | 103 | 21321 | 0.6895    | 47.94     | 184 | 31321 | 0.6314    | 47.94     |
| 23  | 11322 | 0.7009    | 47.75     | 104 | 21322 | 0.6343    | 37.98     | 185 | 31322 | 0.5762    | 37.98     |
| 24  | 11323 | 0.5484    | 33.99     | 105 | 21323 | 0.4819    | 24.22     | 186 | 31323 | 0.4238    | 24.22     |
| 25  | 11331 | 0.7002    | 51.51     | 106 | 21331 | 0.6336    | 41.75     | 187 | 31331 | 0.5755    | 41.75     |
| 26  | 11332 | 0.6450    | 41.55     | 107 | 21332 | 0.5785    | 31.78     | 188 | 31332 | 0.5204    | 31.78     |
| 27  | 11333 | 0.4925    | 27.79     | 108 | 21333 | 0.4260    | 18.02     | 189 | 31333 | 0.3679    | 18.02     |
| 28  | 12111 | 0.9418    | 88.08     | 109 | 22111 | 0.8752    | 78.31     | 190 | 32111 | 0.7738    | 68.86     |
| 29  | 12112 | 0.8866    | 78.11     | 110 | 22112 | 0.8200    | 68.35     | 191 | 32112 | 0.7187    | 58.90     |
| 30  | 12113 | 0.6908    | 54.91     | 111 | 22113 | 0.6243    | 45.14     | 192 | 32113 | 0.5662    | 45.14     |
| 31  | 12121 | 0.9072    | 81.37     | 112 | 22121 | 0.8407    | 71.60     | 193 | 32121 | 0.7393    | 62.16     |
| 32  | 12122 | 0.8521    | 71.41     | 113 | 22122 | 0.7855    | 61.64     | 194 | 32122 | 0.6841    | 52.19     |
| 33  | 12123 | 0.6563    | 48.20     | 114 | 22123 | 0.5897    | 38.43     | 195 | 32123 | 0.5316    | 38.43     |
| 34  | 12131 | 0.8081    | 65.73     | 115 | 22131 | 0.7415    | 55.96     | 196 | 32131 | 0.6834    | 55.96     |
| 35  | 12132 | 0.7529    | 55.76     | 116 | 22132 | 0.6863    | 46.00     | 197 | 32132 | 0.6282    | 46.00     |
| 36  | 12133 | 0.6004    | 42.00     | 117 | 22133 | 0.5339    | 32.24     | 198 | 32133 | 0.4758    | 32.24     |
| 37  | 12211 | 0.8406    | 75.97     | 118 | 22211 | 0.7740    | 66.20     | 199 | 32211 | 0.6726    | 56.75     |
| 38  | 12212 | 0.7854    | 66.00     | 119 | 22212 | 0.7188    | 56.24     | 200 | 32212 | 0.6174    | 46.79     |
| 39  | 12213 | 0.5896    | 42.80     | 120 | 22213 | 0.5231    | 33.03     | 201 | 32213 | 0.4650    | 33.03     |
| 40  | 12221 | 0.8060    | 69.26     | 121 | 22221 | 0.7395    | 59.49     | 202 | 32221 | 0.6381    | 50.05     |
| 41  | 12222 | 0.7508    | 59.30     | 122 | 22222 | 0.6843    | 49.53     | 203 | 32222 | 0.5829    | 40.08     |
| 42  | 12223 | 0.5551    | 36.09     | 123 | 22223 | 0.4885    | 26.32     | 204 | 32223 | 0.4304    | 26.32     |
| 43  | 12231 | 0.7068    | 53.62     | 124 | 22231 | 0.6403    | 43.85     | 205 | 32231 | 0.5822    | 43.85     |
| 44  | 12232 | 0.6517    | 43.65     | 125 | 22232 | 0.5851    | 33.89     | 206 | 32232 | 0.5270    | 33.89     |
| 45  | 12233 | 0.4992    | 29.89     | 126 | 22233 | 0.4326    | 20.13     | 207 | 32233 | 0.3745    | 20.13     |
| 46  | 12311 | 0.7630    | 63.63     | 127 | 22311 | 0.6965    | 53.86     | 208 | 32311 | 0.6384    | 53.86     |
| 47  | 12312 | 0.7078    | 53.67     | 128 | 22312 | 0.6413    | 43.90     | 209 | 32312 | 0.5832    | 43.90     |
| 48  | 12313 | 0.5554    | 39.91     | 129 | 22313 | 0.4888    | 30.14     | 210 | 32313 | 0.4307    | 30.14     |
| 49  | 12321 | 0.7285    | 56.92     | 130 | 22321 | 0.6619    | 47.16     | 211 | 32321 | 0.6038    | 47.16     |
| 50  | 12322 | 0.6733    | 46.96     | 131 | 22322 | 0.6067    | 37.19     | 212 | 32322 | 0.5486    | 37.19     |
| 51  | 12323 | 0.5208    | 33.20     | 132 | 22323 | 0.4543    | 23.43     | 213 | 32323 | 0.3962    | 23.43     |
| 52  | 12331 | 0.6726    | 50.73     | 133 | 22331 | 0.6060    | 40.96     | 214 | 32331 | 0.5479    | 40.96     |
| 53  | 12332 | 0.6174    | 40.76     | 134 | 22332 | 0.5508    | 31.00     | 215 | 32332 | 0.4927    | 31.00     |
| 54  | 12333 | 0.4649    | 27.00     | 135 | 22333 | 0.3984    | 17.24     | 216 | 32333 | 0.3403    | 17.24     |
| 55  | 13111 | 0.8985    | 78.63     | 136 | 23111 | 0.8319    | 68.86     | 217 | 33111 | 0.7738    | 68.86     |
| 56  | 13112 | 0.8433    | 68.67     | 137 | 23112 | 0.7768    | 58.90     | 218 | 33112 | 0.7187    | 58.90     |
| 57  | 13113 | 0.6908    | 54.91     | 138 | 23113 | 0.6243    | 45.14     | 219 | 33113 | 0.5662    | 45.14     |
| 58  | 13121 | 0.8640    | 71.92     | 139 | 23121 | 0.7974    | 62.16     | 220 | 33121 | 0.7393    | 62.16     |
| 59  | 13122 | 0.8088    | 61.96     | 140 | 23122 | 0.7422    | 52.19     | 221 | 33122 | 0.6841    | 52.19     |
| 60  | 13123 | 0.6563    | 48.20     | 141 | 23123 | 0.5897    | 38.43     | 222 | 33123 | 0.5316    | 38.43     |
| 61  | 13131 | 0.8081    | 65.73     | 142 | 23131 | 0.7415    | 55.96     | 223 | 33131 | 0.6834    | 55.96     |
| 62  | 13132 | 0.7529    | 55.76     | 143 | 23132 | 0.6863    | 46.00     | 224 | 33132 | 0.6282    | 46.00     |
| 63  | 13133 | 0.6004    | 42.00     | 144 | 23133 | 0.5339    | 32.24     | 225 | 33133 | 0.4758    | 32.24     |
| 64  | 13211 | 0.7973    | 66.52     | 145 | 23211 | 0.7307    | 56.75     | 226 | 33211 | 0.6726    | 56.75     |
| 65  | 13212 | 0.7421    | 56.56     | 146 | 23212 | 0.6755    | 46.79     | 227 | 33212 | 0.6174    | 46.79     |
| 66  | 13213 | 0.5896    | 42.80     | 147 | 23213 | 0.5231    | 33.03     | 228 | 33213 | 0.4650    | 33.03     |
| 67  | 13221 | 0.7627    | 59.81     | 148 | 23221 | 0.6962    | 50.05     | 229 | 33221 | 0.6381    | 50.05     |
| 68  | 13222 | 0.7075    | 49.85     | 149 | 23222 | 0.6410    | 40.08     | 230 | 33222 | 0.5829    | 40.08     |
| 69  | 13223 | 0.5551    | 36.09     | 150 | 23223 | 0.4885    | 26.32     | 231 | 33223 | 0.4304    | 26.32     |
| 70  | 13231 | 0.7068    | 53.62     | 151 | 23231 | 0.6403    | 43.85     | 232 | 33231 | 0.5822    | 43.85     |
| 71  | 13232 | 0.6517    | 43.65     | 152 | 23232 | 0.5851    | 33.89     | 233 | 33232 | 0.5270    | 33.89     |
| 72  | 13233 | 0.4992    | 29.89     | 153 | 23233 | 0.4326    | 20.13     | 234 | 33233 | 0.3745    | 20.13     |
| 73  | 13311 | 0.7630    | 63.63     | 154 | 23311 | 0.6965    | 53.86     | 235 | 33311 | 0.6384    | 53.86     |
| 74  | 13312 | 0.7078    | 53.67     | 155 | 23312 | 0.6413    | 43.90     | 236 | 33312 | 0.5832    | 43.90     |
| 75  | 13313 | 0.5554    | 39.91     | 156 | 23313 | 0.4888    | 30.14     | 237 | 33313 | 0.4307    | 30.14     |
| 76  | 13321 | 0.7285    | 56.92     | 157 | 23321 | 0.6619    | 47.16     | 238 | 33321 | 0.6038    | 47.16     |
| 77  | 13322 | 0.6733    | 46.96     | 158 | 23322 | 0.6067    | 37.19     | 239 | 33322 | 0.5486    | 37.19     |
| 78  | 13323 | 0.5208    | 33.20     | 159 | 23323 | 0.4543    | 23.43     | 240 | 33323 | 0.3962    | 23.43     |
| 79  | 13331 | 0.6726    | 50.73     | 160 | 23331 | 0.6060    | 40.96     | 241 | 33331 | 0.5479    | 40.96     |
| 80  | 13332 | 0.6174    | 40.76     | 161 | 23332 | 0.5508    | 31.00     | 242 | 33332 | 0.4927    | 31.00     |
| 81  | 13333 | 0.4649    | 27.00     | 162 | 23333 | 0.3984    | 17.24     | 243 | 33333 | 0.3403    | 17.24     |

**Supplementary Table S4** Regression analysis on VAS values, EQ-5D dimensions

(two pages)

| Variable                     | Model 1  |         | Model 2  |         | Model 3  |         | Model 4  |         | Model 5  |         | Model 6  |         | Model 7  |         |
|------------------------------|----------|---------|----------|---------|----------|---------|----------|---------|----------|---------|----------|---------|----------|---------|
|                              | Estimate | p-value | Estimate | p-value | Estimate | p-value | Estimate | p-value | Estimate | p-value | Estimate | p-value | Estimate | p-value |
| <b>Intercept</b>             | 88.83    | <0.0001 | 88.85    | <0.0001 | 88.84    | <0.0001 | 88.86    | <0.0001 | 88.87    | <0.0001 | 88.44    | <0.0001 | 88.00    | <0.0001 |
| <b>Mobility</b>              |          |         |          |         |          |         |          |         |          |         |          |         |          |         |
| Level 2                      | -9.88    | <0.0001 | -9.75    | <0.0001 | -        | -       | -        | -       | -        | -       | -        | -       | -        | -       |
| Level 3                      | -2.72    | 0.5911  | -2.45    | 0.6157  | -        | -       | -        | -       | -        | -       | -        | -       | -        | -       |
| Level 2 and 3                | -        | -       | -        | -       | -9.86    | <0.0001 | -9.77    | <0.0001 | -9.65    | <0.0001 | -9.64    | <0.0001 | -9.56    | <0.0001 |
| <b>Self-care</b>             |          |         |          |         |          |         |          |         |          |         |          |         |          |         |
| Level 2                      | -3.75    | 0.0001  | -3.53    | 0.0002  | -        | -       | -        | -       | -        | -       | -        | -       | -        | -       |
| Level 3                      | 0.58     | 0.7332  | 7.82     | <0.0001 | -        | -       | -        | -       | -        | -       | -        | -       | -        | -       |
| Level 2 and 3                | -        | -       | -        | -       | -2.38    | 0.0060  | -0.79    | 0.3846  | -0.68    | 0.4514  | -0.63    | 0.4879  | -0.57    | 0.5252  |
| <b>Usual activities</b>      |          |         |          |         |          |         |          |         |          |         |          |         |          |         |
| Level 2                      | -12.28   | <0.0001 | -11.85   | <0.0001 | -12.37   | <0.0001 | -12.11   | <0.0001 | -12.21   | <0.0001 | -12.24   | <0.0001 | -12.20   | <0.0001 |
| Level 3                      | -18.01   | <0.0001 | -15.33   | <0.0001 | -17.45   | <0.0001 | -15.00   | <0.0001 | -15.01   | <0.0001 | -15.03   | <0.0001 | -15.03   | <0.0001 |
| <b>Pain/discomfort</b>       |          |         |          |         |          |         |          |         |          |         |          |         |          |         |
| Level 2                      | -6.73    | <0.0001 | -6.71    | <0.0001 | -6.73    | <0.0001 | -6.71    | <0.0001 | -6.72    | <0.0001 | -6.76    | <0.0001 | -6.69    | <0.0001 |
| Level 3                      | -20.00   | <0.0001 | -10.94   | <0.0001 | -20.11   | <0.0001 | -12.90   | <0.0001 | -12.94   | <0.0001 | -12.99   | <0.0001 | -12.86   | <0.0001 |
| <b>Anxiety/depression</b>    |          |         |          |         |          |         |          |         |          |         |          |         |          |         |
| Level 2                      | -10.04   | <0.0001 | -9.93    | <0.0001 | -10.05   | <0.0001 | -9.96    | <0.0001 | -9.97    | <0.0001 | -10.05   | <0.0001 | -10.03   | <0.0001 |
| Level 3                      | -30.52   | <0.0001 | -22.07   | <0.0001 | -30.52   | <0.0001 | -23.72   | <0.0001 | -23.75   | <0.0001 | -23.80   | <0.0001 | -23.72   | <0.0001 |
| <b>N3</b>                    | -        | -       | -11.73   | <0.0001 | -        | -       | -9.45    | <0.0001 | -9.47    | <0.0001 | -9.49    | <0.0001 | -9.47    | <0.0001 |
| <b>Age group<sup>a</sup></b> |          |         |          |         |          |         |          |         |          |         |          |         |          |         |
| 25-34                        | -        | -       | -        | -       | -        | -       | -        | -       | 0.01     | 0.9766  | 0.00     | 0.9968  | -0.42    | 0.1220  |
| 35-44                        | -        | -       | -        | -       | -        | -       | -        | -       | -0.44    | 0.0867  | -0.42    | 0.1066  | -0.91    | 0.0008  |
| 45-54                        | -        | -       | -        | -       | -        | -       | -        | -       | 0.43     | 0.0974  | 0.47     | 0.0682  | 0.00     | 0.9950  |
| 55-64                        | -        | -       | -        | -       | -        | -       | -        | -       | 0.34     | 0.1966  | 0.40     | 0.1222  | -0.06    | 0.8355  |
| 65-74                        | -        | -       | -        | -       | -        | -       | -        | -       | 0.02     | 0.9434  | 0.10     | 0.7660  | -0.14    | 0.6747  |
| 75-80                        | -        | -       | -        | -       | -        | -       | -        | -       | -3.09    | <0.0001 | -3.00    | <0.0001 | -2.90    | <0.0001 |
| <b>Sex<sup>b</sup></b>       | -        | -       | -        | -       | -        | -       | -        | -       | -        | -       | 0.79     | <0.0001 | 0.74     | <0.0001 |

|                                        |                                  |                                  |                                 |                                 |                                  |                                  |                                 |                                 |
|----------------------------------------|----------------------------------|----------------------------------|---------------------------------|---------------------------------|----------------------------------|----------------------------------|---------------------------------|---------------------------------|
| <b>Educational level<sup>c</sup></b>   |                                  |                                  |                                 |                                 |                                  |                                  |                                 |                                 |
| Medium                                 | -                                | -                                | -                               | -                               | -                                | -                                | -                               | 0.35 0.1063                     |
| High                                   | -                                | -                                | -                               | -                               | -                                | -                                | -                               | 0.34 0.1454                     |
| Missing                                | -                                | -                                | -                               | -                               | -                                | -                                | -                               | -0.19 0.7604                    |
|                                        |                                  |                                  |                                 |                                 |                                  |                                  |                                 |                                 |
| <b>Socioeconomic group<sup>d</sup></b> |                                  |                                  |                                 |                                 |                                  |                                  |                                 |                                 |
| Skilled manual                         | -                                | -                                | -                               | -                               | -                                | -                                | -                               | 0.56 0.0292                     |
| Lower non-manual                       | -                                | -                                | -                               | -                               | -                                | -                                | -                               | 0.88 0.0006                     |
| Intermed non-manual                    | -                                | -                                | -                               | -                               | -                                | -                                | -                               | 0.99 <0.0001                    |
| Higher non-manual                      | -                                | -                                | -                               | -                               | -                                | -                                | -                               | 0.72 0.0037                     |
| Self-employed                          | -                                | -                                | -                               | -                               | -                                | -                                | -                               | 1.32 0.0001                     |
| Other                                  | -                                | -                                | -                               | -                               | -                                | -                                | -                               | 0.04 0.8750                     |
|                                        |                                  |                                  |                                 |                                 |                                  |                                  |                                 |                                 |
| <b>Observations</b>                    | 41,761                           | 41,761                           | 41,761                          | 41,761                          | 41,761                           | 41,761                           | 41,761                          | 41,761                          |
| <b>Adjusted R<sup>2</sup></b>          | 0.4845                           | 0.4875                           | 0.4841                          | 0.4864                          | 0.4873                           | 0.4877                           | 0.4882                          |                                 |
|                                        |                                  |                                  |                                 |                                 |                                  |                                  |                                 |                                 |
| <b>F statistics<sup>e, f</sup></b>     | F <sub>(1,38111)</sub> =32.78 *  | F <sub>(1,38110)</sub> =31.05 *  | F <sub>(1,38113)</sub> =32.15 * | F <sub>(1,38112)</sub> =30.02 * | F <sub>(1,38112)</sub> =30.02 *  | F <sub>(1,38112)</sub> =30.02 *  | F <sub>(1,38112)</sub> =30.02 * | F <sub>(1,38112)</sub> =30.02 * |
| <b>F statistics<sup>e, g</sup></b>     |                                  |                                  |                                 |                                 | F <sub>(88,38104)</sub> =3.56 *  | F <sub>(20,38102)</sub> =5.62 *  | F <sub>(28,38084)</sub> =3.54 * |                                 |
| <b>F statistics<sup>e, h</sup></b>     | F <sub>(21,38101)</sub> =42.35 * | F <sub>(22,38100)</sub> =25.59 * | F <sub>(8,38105)</sub> =49.93 * | F <sub>(9,38103)</sub> =46.24 * | F <sub>(27,38095)</sub> =45.86 * | F <sub>(29,38093)</sub> =46.12 * | F <sub>(9,38075)</sub> =47.63 * |                                 |

<sup>a</sup> Reference group: 18-24 years

<sup>b</sup> Reference group: men

<sup>c</sup> Reference group: low educational level

<sup>d</sup> Reference group: unskilled manual workers

<sup>e</sup> Age restricted to 18-64 years

<sup>f</sup> F-test of equal intercepts in the two surveys

<sup>g</sup> F-test of equal parameters of all non-dimensional regressors in the two surveys

<sup>h</sup> F-test of equal parameters of all dimensional regressors in the two surveys

\* p=0.001

VAS visual analogue scale

**Supplementary Table S5** Correlation and Mean Absolute Difference (MAD), VAS values, EQ-5D

| Number of health states | VAS         |      |             |      |             |      |             |      |
|-------------------------|-------------|------|-------------|------|-------------|------|-------------|------|
|                         | Model 1     |      | Model 2     |      | Model 3     |      | Model 4     |      |
|                         | Correlation | MAD  | Correlation | MAD  | Correlation | MAD  | Correlation | MAD  |
| <b>n&gt;=5</b>          | 0.942       | 5.11 | 0.942       | 4.49 | 0.929       | 5.40 | 0.919       | 5.22 |
| <b>n&gt;=10</b>         | 0.957       | 4.42 | 0.967       | 3.57 | 0.955       | 4.49 | 0.960       | 3.81 |

VAS visual analogue scale

**Supplementary Table S6** Regression analysis, comparison of TTO and VAS values, EQ-5D dimensions, main effect models, pooled data

| Variable                      | TTO                 |         |                     |         | VAS                 |         |                     |         |
|-------------------------------|---------------------|---------|---------------------|---------|---------------------|---------|---------------------|---------|
|                               | Model 2<br>Estimate | p-value | Model 4<br>Estimate | p-value | Model 2<br>Estimate | p-value | Model 4<br>Estimate | p-value |
| <b>Intercept</b>              | 0.9716              | <0.0001 | 0.9717              | <0.0001 | 88.94               | <0.0001 | 88.95               | <0.0001 |
| <b>Mobility</b>               |                     |         |                     |         |                     |         |                     |         |
| Level 2                       | -0.0652             | <0.0001 | -0.0663             | <0.0001 | -9.53               | <0.0001 | -                   | -       |
| Level 3                       | -0.1448             | 0.0026  | -0.1060             | 0.0216  | -3.58               | 0.5155  | -                   | -       |
| Level 2 and 3                 |                     |         |                     |         |                     |         | -9.57               | <0.0001 |
| <b>Self-care</b>              |                     |         |                     |         |                     |         |                     |         |
| Level 2                       | -0.0588             | <0.0001 | -                   | -       | -3.51               | 0.0008  | -                   | -       |
| Level 3                       | 0.0772              | 0.0014  | -                   | -       | 8.29                | <0.0001 | -                   | -       |
| Level 2 and 3                 | -                   | -       | -0.0291             | 0.0242  | -                   | -       | -0.54               | 0.5851  |
| <b>Usual activities</b>       |                     |         |                     |         |                     |         |                     |         |
| Level 2                       | -0.1012             | <0.0001 | -0.1038             | <0.0001 | -12.06              | <0.0001 | -12.32              | <0.0001 |
| Level 3                       | -0.1331             | <0.0001 | -0.1356             | <0.0001 | -15.21              | <0.0001 | -14.99              | <0.0001 |
| <b>Pain/discomfort</b>        |                     |         |                     |         |                     |         |                     |         |
| Level 2                       | -0.0336             | <0.0001 | -0.0336             | <0.0001 | -6.53               | <0.0001 | -6.53               | <0.0001 |
| Level 3                       | -0.0676             | <0.0001 | -0.0888             | <0.0001 | -10.65              | <0.0001 | -12.59              | <0.0001 |
| <b>Anxiety/depression</b>     |                     |         |                     |         |                     |         |                     |         |
| Level 2                       | -0.0532             | <0.0001 | -0.0535             | <0.0001 | -9.88               | <0.0001 | -9.91               | <0.0001 |
| Level 3                       | -0.1904             | <0.0001 | -0.2094             | <0.0001 | -22.15              | <0.0001 | -23.83              | <0.0001 |
| <b>N3</b>                     | -0.0779             | <0.0001 | -0.0525             | 0.0005  | -12.08              | <0.0001 | -9.78               | <0.0001 |
| <b>Observations</b>           | 39,527              |         | 39,527              |         | 39,527              |         | 39,527              |         |
| <b>Adjusted R<sup>2</sup></b> | 0.2536              |         | 0.2523              |         | 0.4783              |         | 0.4772              |         |

TTO time tradeoff, VAS visual analogue scale

**Supplementary Table S7** Regression analysis on TTO and VAS values, EQ-5D dimensions, main effect models, comparison by survey

| Variable                      | TTO         |         |             |         |             |         |             |         | VAS         |         |             |         |                          |         |             |         |        |         |
|-------------------------------|-------------|---------|-------------|---------|-------------|---------|-------------|---------|-------------|---------|-------------|---------|--------------------------|---------|-------------|---------|--------|---------|
|                               | Model 2     |         |             |         | Model 4     |         |             |         | Model 2     |         |             |         | Model 4                  |         |             |         |        |         |
|                               | 2004 Survey |         | 2006 Survey |         | 2004 Survey |         | 2006 Survey |         | 2004 Survey |         | 2006 Survey |         | 2004 Survey <sup>a</sup> |         | 2006 Survey |         |        |         |
|                               | Estimate    | p-value | Estimate    | p-value | Estimate    | p-value | Estimate    | p-value | Estimate    | p-value | Estimate    | p-value | Estimate                 | p-value | Estimate    | p-value |        |         |
| <b>Intercept</b>              | 0.9639      | <0.0001 | 0.9741      | <0.0001 | 0.9640      | <0.0001 | 0.9741      | <0.0001 | 89.05       | <0.0001 | 88.63       | <0.0001 | 89.07                    | <0.0001 | 89.07       | <0.0001 | 88.64  | <0.0001 |
| <b>Mobility</b>               |             |         |             |         |             |         |             |         |             |         |             |         |                          |         |             |         |        |         |
| Level 2                       | -0.0712     | <0.0001 | -0.0561     | <0.0001 | -0.0717     | <0.0001 | -0.0570     | <0.0001 | -10.80      | <0.0001 | -8.55       | <0.0001 | -                        | -       | -           | -       | -      | -       |
| Level 3                       | -0.1532     | 0.0168  | -0.1590     | 0.0068  | -0.1225     | 0.0520  | -0.1325     | 0.0200  | 2.47        | 0.7405  | -6.99       | 0.2765  | -                        | -       | -           | -       | -      | -       |
| Level 2 and 3                 |             |         |             |         |             |         |             |         | -           | -       | -           | -       | -10.81                   | <0.0001 | -10.80      | <0.0001 | -8.60  | <0.0001 |
| <b>Self-care</b>              |             |         |             |         |             |         |             |         |             |         |             |         |                          |         |             |         |        |         |
| Level 2                       | -0.0471     | 0.0083  | -0.0543     | 0.0030  | -           | -       | -           | -       | -3.90       | 0.0069  | -4.30       | 0.0005  | -                        | -       | -           | -       | -      | -       |
| Level 3                       | 0.0421      | 0.1795  | 0.0532      | 0.0889  | -           | -       | -           | -       | 9.01        | 0.0004  | 7.51        | 0.0079  | -                        | -       | -           | -       | -      | -       |
| Level 2 and 3                 | -           | -       | -           | -       | -0.0249     | 0.1182  | -0.0349     | 0.0345  | -           | -       | -           | -       | 0.25                     | 0.8597  | -           | -       | -2.25  | 0.0549  |
| <b>Usual activities</b>       |             |         |             |         |             |         |             |         |             |         |             |         |                          |         |             |         |        |         |
| Level 2                       | -0.0979     | <0.0001 | -0.1111     | <0.0001 | -0.0998     | <0.0001 | -0.1128     | <0.0001 | -12.24      | <0.0001 | -12.55      | <0.0001 | -12.60                   | <0.0001 | -12.58      | <0.0001 | -12.74 | <0.0001 |
| Level 3                       | -0.1195     | <0.0001 | -0.1628     | <0.0001 | -0.1235     | <0.0001 | -0.1635     | <0.0001 | -15.40      | <0.0001 | -16.90      | <0.0001 | -14.30                   | <0.0001 | -14.26      | <0.0001 | -17.00 | <0.0001 |
| <b>Pain/discomfort</b>        |             |         |             |         |             |         |             |         |             |         |             |         |                          |         |             |         |        |         |
| Level 2                       | -0.0339     | <0.0001 | -0.0303     | <0.0001 | -0.0339     | <0.0001 | -0.0302     | <0.0001 | -6.68       | <0.0001 | -6.58       | <0.0001 | -6.69                    | <0.0001 | -6.69       | <0.0001 | -6.56  | <0.0001 |
| Level 3                       | -0.0725     | 0.0005  | -0.0703     | 0.0005  | -0.0895     | <0.0001 | -0.0830     | <0.0001 | -8.25       | <0.0001 | -12.00      | <0.0001 | -10.66                   | <0.0001 | -10.70      | <0.0001 | -13.59 | <0.0001 |
| <b>Anxiety/depression</b>     |             |         |             |         |             |         |             |         |             |         |             |         |                          |         |             |         |        |         |
| Level 2                       | -0.0611     | <0.0001 | -0.0494     | <0.0001 | -0.0613     | <0.0001 | -0.0496     | <0.0001 | -11.05      | <0.0001 | -9.00       | <0.0001 | -11.09                   | <0.0001 | -11.09      | <0.0001 | -9.02  | <0.0001 |
| Level 3                       | -0.2116     | <0.0001 | -0.1846     | <0.0001 | -0.2262     | <0.0001 | -0.1962     | <0.0001 | -26.74      | <0.0001 | -18.70      | <0.0001 | -28.62                   | <0.0001 | -28.68      | <0.0001 | -20.11 | <0.0001 |
| <b>N3</b>                     | -0.0706     | 0.0013  | -0.0403     | 0.0603  | -0.0507     | 0.0075  | -0.0247     | 0.2125  | -15.14      | <0.0001 | -8.12       | <0.0001 | -12.46                   | <0.0001 | -12.39      | <0.0001 | -6.19  | <0.0001 |
| <b>Observations</b>           | 24,090      |         | 21,387      |         | 24,090      |         | 21,387      |         | 20,229      |         | 21,532      |         | 20,229                   |         | 20,229      |         | 21,532 |         |
| <b>Adjusted R<sup>2</sup></b> | 0.2372      |         | 0.2441      |         | 0.2367      |         | 0.2433      |         | 0.5186      |         | 0.4642      |         | 0.5169                   |         | 0.5169      |         | 0.4633 |         |

<sup>a</sup> We present an alternative Model 4 for the 2004 survey without positive and non-significant the coefficient for self-care level 2 and 3

**Supplementary Table S8** Regression analysis on TTO and VAS values, SRH

(two pages)

| Variable                     | TTO                             |                                 |                                 |                                 | VAS                             |                                 |                                 |                                 |
|------------------------------|---------------------------------|---------------------------------|---------------------------------|---------------------------------|---------------------------------|---------------------------------|---------------------------------|---------------------------------|
|                              | Model 1 SRH<br>Estimate p-value | Model 2 SRH<br>Estimate p-value | Model 3 SRH<br>Estimate p-value | Model 4 SRH<br>Estimate p-value | Model 1 SRH<br>Estimate p-value | Model 2 SRH<br>Estimate p-value | Model 3 SRH<br>Estimate p-value | Model 4 SRH<br>Estimate p-value |
| <b>Intercept</b>             | 0.9751 <0.0001                  | 0.9623 <0.0001                  | 0.9589 <0.0001                  | 0.9559 <0.0001                  | 92.16 <0.0001                   | 91.51 <0.0001                   | 91.87 <0.0001                   | 92.09 <0.0001                   |
| <b>SRH<sup>a</sup></b>       |                                 |                                 |                                 |                                 |                                 |                                 |                                 |                                 |
| Good health                  | -0.0309 <0.0001                 | -0.0314 <0.0001                 | -0.0315 <0.0001                 | -0.0305 <0.0001                 | -8.80 <0.0001                   | -8.92 <0.0001                   | -8.91 <0.0001                   | -8.92 <0.0001                   |
| Fair health                  | -0.1402 <0.0001                 | -0.1411 <0.0001                 | -0.1414 <0.0001                 | -0.1389 <0.0001                 | -26.53 <0.0001                  | -26.84 <0.0001                  | -26.81 <0.0001                  | -26.81 <0.0001                  |
| Poor health                  | -0.3166 <0.0001                 | -0.3184 <0.0001                 | -0.3189 <0.0001                 | -0.3152 <0.0001                 | -50.52 <0.0001                  | -50.87 <0.0001                  | -50.81 <0.0001                  | -50.76 <0.0001                  |
| Very poor health             | -0.4792 <0.0001                 | -0.4811 <0.0001                 | -0.4817 <0.0001                 | -0.4768 <0.0001                 | -64.11 <0.0001                  | -64.43 <0.0001                  | -64.38 <0.0001                  | -64.30 <0.0001                  |
| <b>Age group<sup>b</sup></b> |                                 |                                 |                                 |                                 |                                 |                                 |                                 |                                 |
| 25-34                        | - -                             | 0.0102 0.0007                   | 0.0101 0.0007                   | 0.0042 0.1814                   | - -                             | 0.06 0.8244                     | 0.06 0.8024                     | -0.17 0.5182                    |
| 35-44                        | - -                             | 0.0107 0.0003                   | 0.0109 0.0002                   | 0.0039 0.2120                   | - -                             | 0.05 0.8386                     | 0.03 0.9050                     | -0.28 0.2817                    |
| 45-54                        | - -                             | 0.0176 <0.0001                  | 0.0179 <0.0001                  | 0.0111 0.0004                   | - -                             | 1.03 <0.0001                    | 0.99 <0.0001                    | 0.68 0.0089                     |
| 55-64                        | - -                             | 0.0230 <0.0001                  | 0.0235 <0.0001                  | 0.0164 <0.0001                  | - -                             | 1.79 <0.0001                    | 1.73 <0.0001                    | 1.40 <0.0001                    |
| 65-74                        | - -                             | 0.0188 <0.0001                  | 0.0193 <0.0001                  | 0.0149 <0.0001                  | - -                             | 2.40 <0.0001                    | 2.34 <0.0001                    | 2.11 <0.0001                    |
| 75-80                        | - -                             | -0.0255 <0.0001                 | -0.0248 <0.0001                 | -0.0146 0.0565                  | - -                             | 0.41 0.4268                     | 0.33 0.5233                     | 0.66 0.3113                     |
| <b>Sex<sup>c</sup></b>       | - -                             | - -                             | 0.0058 0.0001                   | 0.0053 0.0005                   | - -                             | - -                             | -0.62 <0.0001                   | -0.65 <0.0001                   |



| <b>Educational level<sup>d</sup></b>   |                                 |                                  |                                  |                                 |                                 |                                  |                                  |                                 |                                  |                                  |                                  |                                 |
|----------------------------------------|---------------------------------|----------------------------------|----------------------------------|---------------------------------|---------------------------------|----------------------------------|----------------------------------|---------------------------------|----------------------------------|----------------------------------|----------------------------------|---------------------------------|
| Medium                                 | -                               | -                                | -                                | -                               | 0.0000                          | 0.9992                           | -                                | -                               | -                                | -                                | -0.07                            | 0.7331                          |
| High                                   | -                               | -                                | -                                | -                               | 0.0009                          | 0.7468                           | -                                | -                               | -                                | -                                | -0.39                            | 0.0820                          |
| Missing                                | -                               | -                                | -                                | -                               | -0.0171                         | 0.0105                           | -                                | -                               | -                                | -                                | -0.73                            | 0.2073                          |
|                                        |                                 |                                  |                                  |                                 |                                 |                                  |                                  |                                 |                                  |                                  |                                  |                                 |
| <b>Socioeconomic group<sup>e</sup></b> |                                 |                                  |                                  |                                 |                                 |                                  |                                  |                                 |                                  |                                  |                                  |                                 |
| Skilled manual                         | -                               | -                                | -                                | -                               | 0.0080                          | 0.0061                           | -                                | -                               | -                                | -                                | 0.60                             | 0.0184                          |
| Lower non-manual                       | -                               | -                                | -                                | -                               | 0.0115                          | <0.0001                          | -                                | -                               | -                                | -                                | 0.54                             | 0.0303                          |
| Intermed non-manual                    | -                               | -                                | -                                | -                               | 0.0137                          | <0.0001                          | -                                | -                               | -                                | -                                | 0.75                             | 0.0007                          |
| Higher non-manual                      | -                               | -                                | -                                | -                               | 0.0168                          | <0.0001                          | -                                | -                               | -                                | -                                | 0.35                             | 0.1340                          |
| Self-employed                          | -                               | -                                | -                                | -                               | 0.0137                          | 0.0005                           | -                                | -                               | -                                | -                                | 0.49                             | 0.1226                          |
| Other                                  | -                               | -                                | -                                | -                               | 0.0000                          | 0.9909                           | -                                | -                               | -                                | -                                | -0.44                            | 0.0524                          |
|                                        |                                 |                                  |                                  |                                 |                                 |                                  |                                  |                                 |                                  |                                  |                                  |                                 |
| <b>Observations</b>                    | 44,736                          | 44,736                           | 44,736                           | 44,736                          | 41,124                          | 41,124                           | 41,124                           | 41,124                          | 41,124                           | 41,124                           | 41,124                           | 41,124                          |
| <b>Adjusted R<sup>2</sup></b>          | 0.2261                          | 0.2287                           | 0.2290                           | 0.2303                          | 0.5304                          | 0.5323                           | 0.5326                           | 0.5326                          | 0.5326                           | 0.5326                           | 0.5330                           | 0.5330                          |
|                                        |                                 |                                  |                                  |                                 |                                 |                                  |                                  |                                 |                                  |                                  |                                  |                                 |
| <b>F statistics<sup>e, f</sup></b>     | F <sub>(1,40603)</sub> =53.37 * | F <sub>(1,40603)</sub> =53.37 *  | F <sub>(1,40603)</sub> =53.37 *  | F <sub>(1,40603)</sub> =53.37 * | F <sub>(1,37611)</sub> =15.51 * | F <sub>(1,37611)</sub> =15.51 *  | F <sub>(1,37611)</sub> =15.51 *  | F <sub>(1,37611)</sub> =15.51 * | F <sub>(1,37611)</sub> =15.51 *  | F <sub>(1,37611)</sub> =15.51 *  | F <sub>(1,37611)</sub> =15.51 *  | F <sub>(1,37611)</sub> =15.51 * |
| <b>F statistics<sup>e, g</sup></b>     |                                 | F <sub>(13,40595)</sub> =12.74 * | F <sub>(15,40595)</sub> =11.78 * | F <sub>(28,40575)</sub> =6.44 * |                                 | F <sub>(13,37603)</sub> =23.16 * | F <sub>(15,37601)</sub> =21.40 * | F <sub>(28,37583)</sub> =9.39 * | F <sub>(13,37603)</sub> =23.16 * | F <sub>(15,37601)</sub> =21.40 * | F <sub>(28,37583)</sub> =9.39 *  | F <sub>(28,37583)</sub> =9.39 * |
| <b>F statistics<sup>e, h</sup></b>     | F <sub>(9,40599)</sub> =2.03 ** | F <sub>(17,40591)</sub> =1.79 ** | F <sub>(19,40589)</sub> =1.76 ** | F <sub>(4,40571)</sub> =1.56    | F <sub>(9,37609)</sub> =16.49 * | F <sub>(17,37599)</sub> =17.44 * | F <sub>(19,37597)</sub> =17.36 * | F <sub>(4,37579)</sub> =18.73 * | F <sub>(9,37609)</sub> =16.49 *  | F <sub>(17,37599)</sub> =17.44 * | F <sub>(19,37597)</sub> =17.36 * | F <sub>(4,37579)</sub> =18.73 * |

<sup>a</sup> Reference group: very good SRH

<sup>b</sup> Reference group: 18-24 years

<sup>c</sup> Reference group: men

<sup>c</sup> Reference group: low educational level

<sup>e</sup> Reference group: unskilled manual workers

<sup>f</sup> Age restricted to 18-64 years

<sup>g</sup> F-test of equal intercepts in the two surveys

<sup>h</sup> F-test of equal parameters of all non-dimensional regressors in the two surveys

<sup>i</sup> F-test of equal parameters of all dimensional regressors in the two surveys

\* p=0.001

\*\* p=0.001

TTO time trade off, VAS visual analogue scale, SRH self-rated health

**Supplementary Table S9** Estimated TTO and VAS values for SRH

| <b>Self-Rated Health</b> | <b>Estimated TTO value</b> | <b>Estimated VAS value</b> |
|--------------------------|----------------------------|----------------------------|
| Very good health         | 0.9751                     | 92.16                      |
| Good health              | 0.9442                     | 83.36                      |
| Fair health              | 0.8349                     | 65.63                      |
| Poor health              | 0.6585                     | 41.64                      |
| Very poor health         | 0.4959                     | 28.05                      |

*TTO* time trade off, *VAS* visual analogue scale, *SRH* self-rated health

**Supplementary Table S10** Regression analysis, comparison of TTO and VAS values, SRH, main effect model, pooled data

| Variable                      | TTO                  |         | VAS                  |         |
|-------------------------------|----------------------|---------|----------------------|---------|
|                               | Model 1 SRH Estimate | p-value | Model 1 SRH Estimate | p-value |
| Intercept                     | 0.9768               | <0.0001 | 92.21                | <0.0001 |
|                               |                      |         |                      |         |
| <b>SRH<sup>a</sup></b>        |                      |         |                      |         |
| Good health                   | -0.0296              | <0.0001 | -8.76                | <0.0001 |
| Fair health                   | -0.1394              | <0.0001 | -26.17               | <0.0001 |
| Poor health                   | -0.3311              | <0.0001 | -50.55               | <0.0001 |
| Very poor health              | -0.4939              | <0.0001 | -64.50               | <0.0001 |
|                               |                      |         |                      |         |
| <b>Observations</b>           | 38,941               |         | 38,941               |         |
| <b>Adjusted R<sup>2</sup></b> | 0.2417               |         | 0.5235               |         |

<sup>a</sup> Reference group: very good SRH  
*TTO* time trade off, *VAS* visual analogue scale, *SRH* self-rated health

**Supplementary Table S11** Regression analysis on TTO and VAS values, SRH, main effect model, comparison by survey

| Variable                      | TTO         |         |             |         | VAS         |         |             |         |
|-------------------------------|-------------|---------|-------------|---------|-------------|---------|-------------|---------|
|                               | Model 1 SRH |         |             |         | Model 1 SRH |         |             |         |
|                               | 2004 survey |         | 2006 survey |         | 2004 survey |         | 2006 survey |         |
|                               | Estimate    | p-value | Estimate    | p-value | Estimate    | p-value | Estimate    | p-value |
| <b>Intercept</b>              | 0.9670      | <0.0001 | 0.9804      | <0.0001 | 91.60       | <0.0001 | 92.68       | <0.0001 |
| <b>SRH<sup>a</sup></b>        |             |         |             |         |             |         |             |         |
| Good health                   | -0.0322     | <0.0001 | -0.0292     | <0.0001 | -8.05       | <0.0001 | -9.49       | <0.0001 |
| Fair health                   | -0.1391     | <0.0001 | -0.1399     | <0.0001 | -25.94      | <0.0001 | -27.07      | <0.0001 |
| Poor health                   | -0.3134     | <0.0001 | -0.3189     | <0.0001 | -51.78      | <0.0001 | -48.93      | <0.0001 |
| Very poor health              | -0.4670     | <0.0001 | -0.4949     | <0.0001 | -63.52      | <0.0001 | -64.66      | <0.0001 |
| <b>Observations</b>           | 23,548      |         | 21,188      |         | 19,785      |         | 21,339      |         |
| <b>Adjusted R<sup>2</sup></b> | 0.2200      |         | 0.2304      |         | 0.5330      |         | 0.5286      |         |

<sup>a</sup> Reference group: very good SRH  
TTO time trade off, VAS visual analogue scale, SRH self-rated health

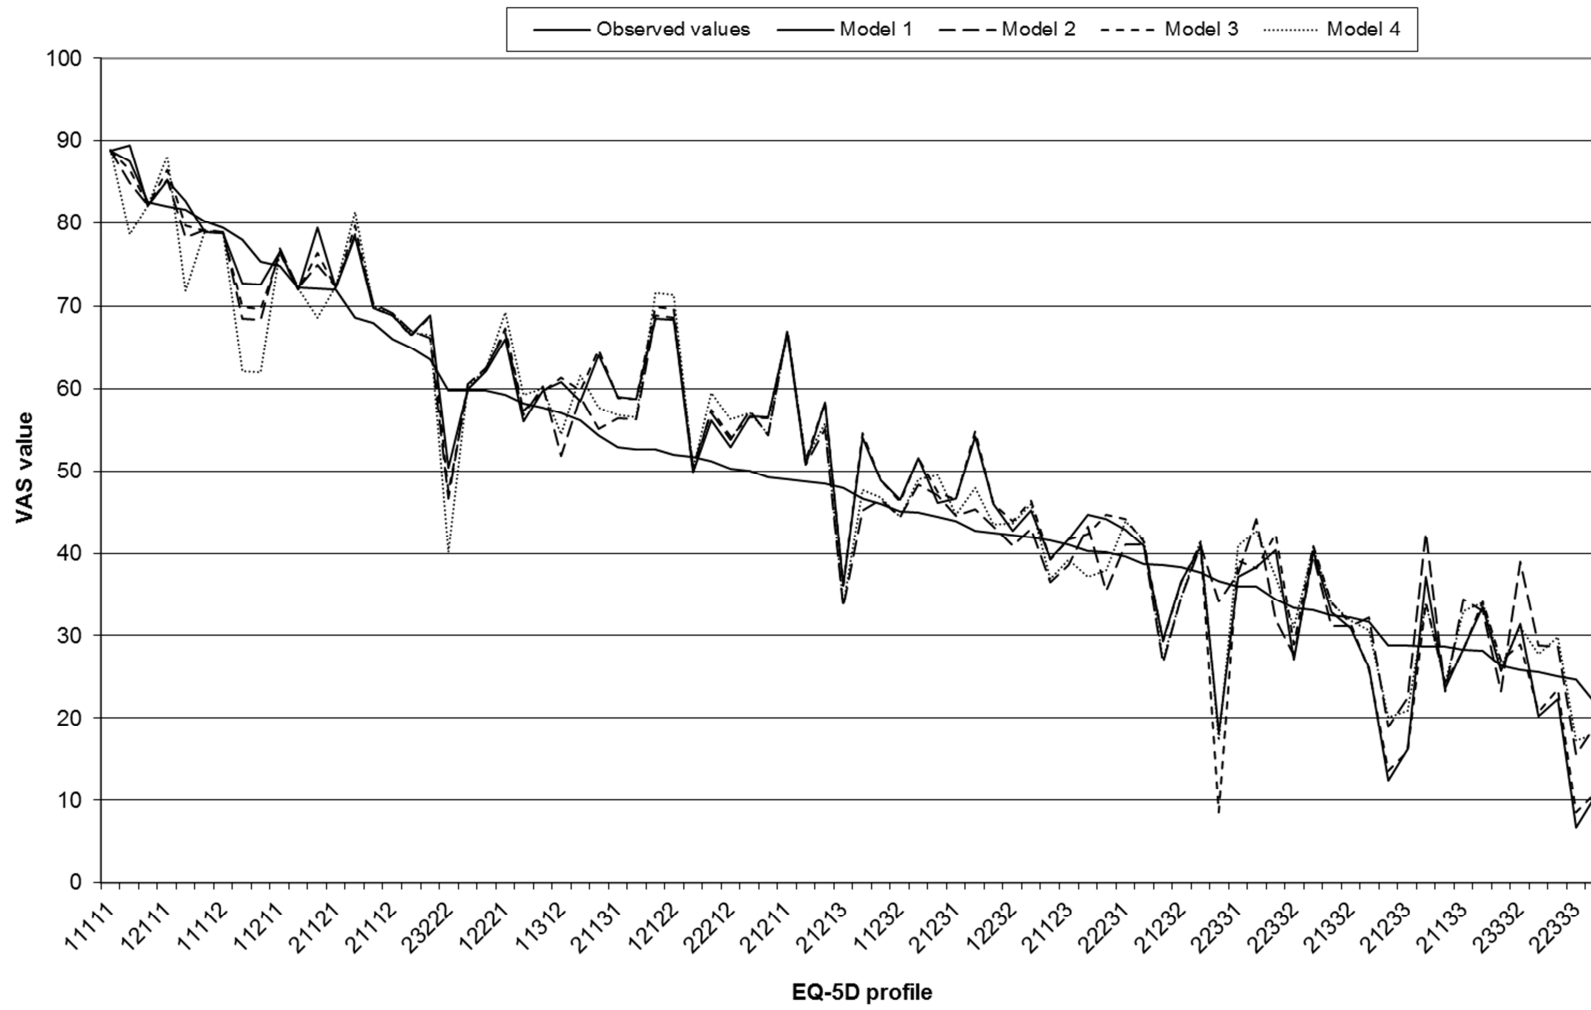

**Supplementary Fig. S1** Estimated VAS values predicted by different OLS models compared to the observed mean VAS values for health states with five or more observations (n=80)
